# Supplementary material for: Set Protein Is Involved in FLT3 Membrane Trafficking
Source: MDPI journal article supplement (doi:10.3390/cancers15082233), 2023-04-10
Supplement: s1 [file s1]

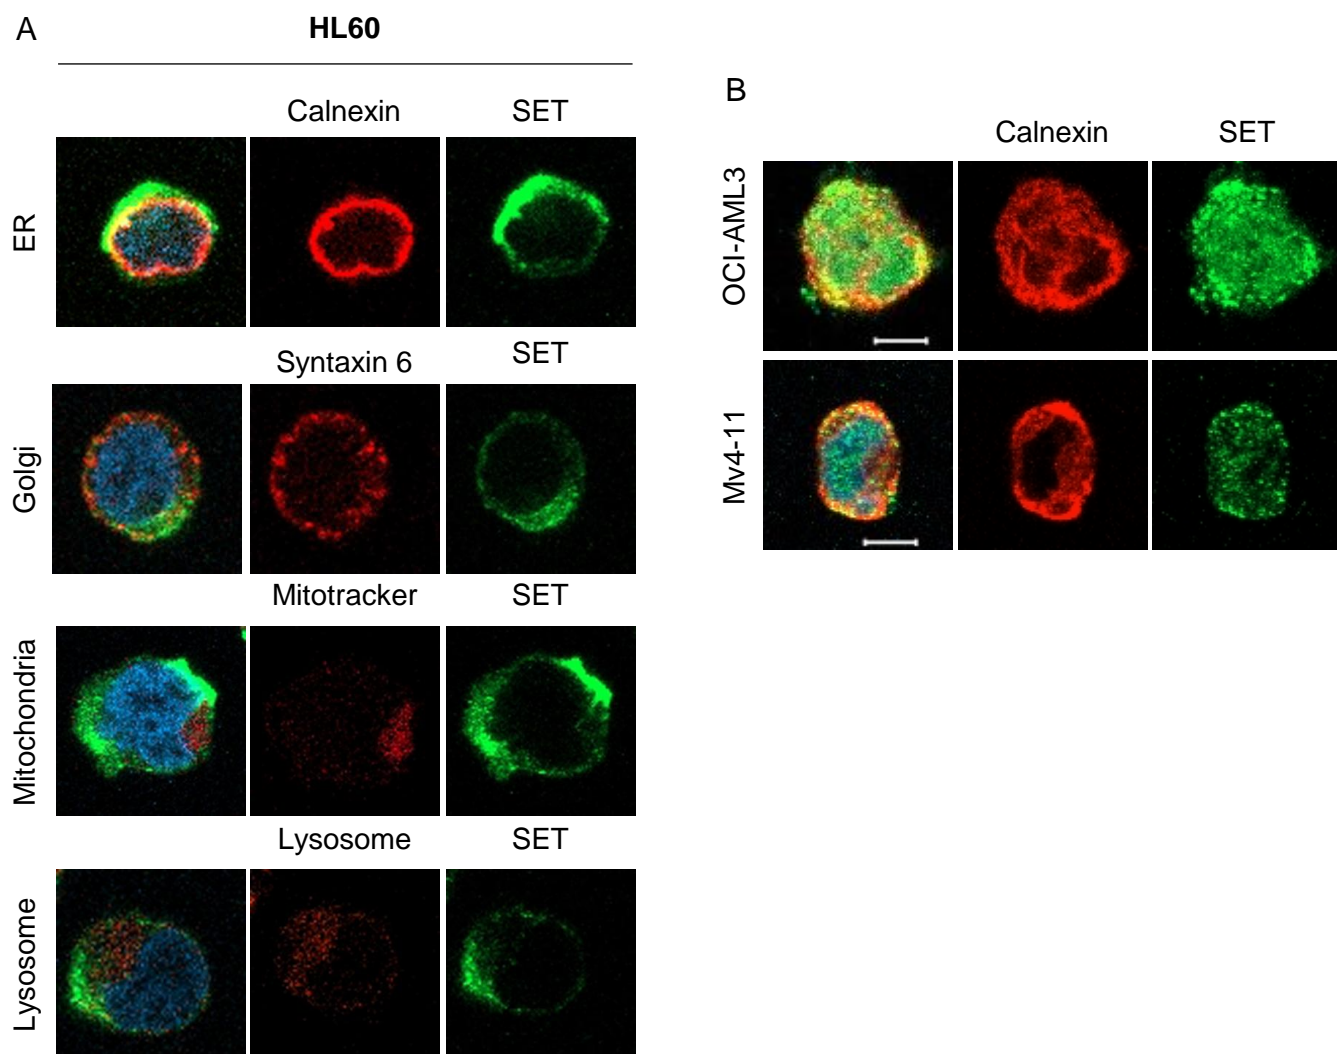

**Figure S1. SET is associated to the ER in AML cells.**

(A) Immunofluorescence of SET (green) and different organelle markers (red) in HL60 cells. Endoplasmic reticulum (ER) marker Calnexin; Golgi apparatus marker Syntaxin 6; mitochondrial marker mitotracker and lysosomal marker lysotracker. Confocal microscopy showed co-localization (yellow) of the ER marker calnexin and SET. Nucleus are stained with DAPI (blue). (B) Immunofluorescence of SET (green) and the ER marker Calnexin (red) in FLT3-WT AML cells OCI-AML3 and FLT3-ITD cells MV4-11. Representative picture of each staining is shown. Immunofluorescences were visualized by confocal microscopy. Scale bar represent 5  $\mu$ m.

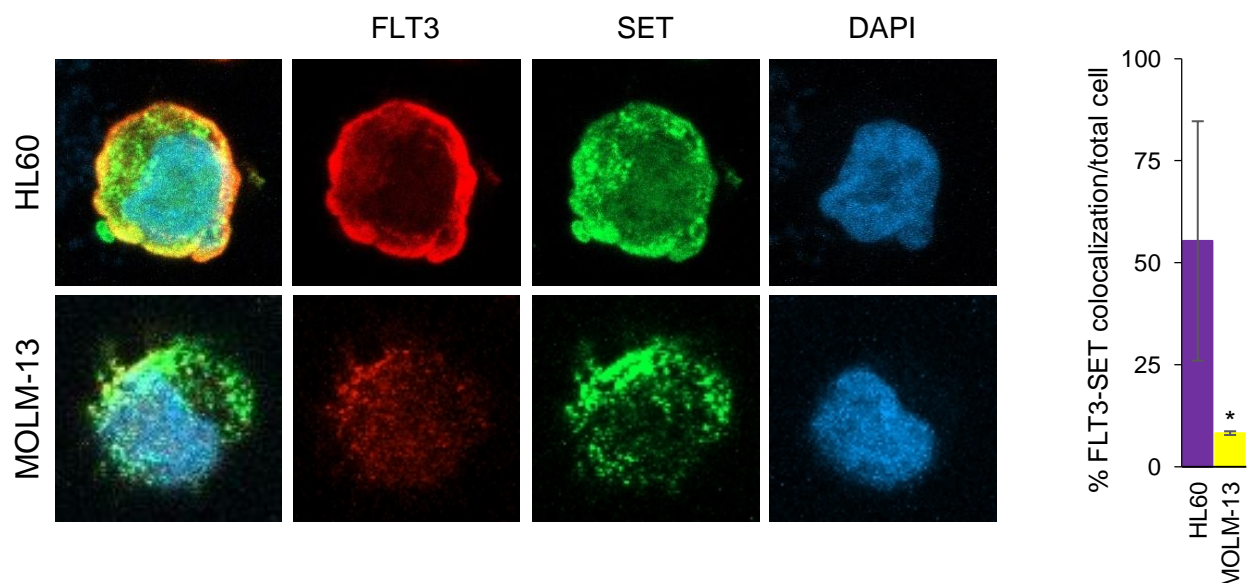

**Figure S2. SET and FLT3 co-localize in FLT3-WT cells but hardly co-localize in FLT3-ITD AML cells.** Immunofluorescence of SET (green) and FLT3 (red) in AML cell lines HL60 (FLT3-WT) and MOLM-13 (FLT3-ITD). Nuclei were stained with DAPI (blue). Confocal microscopy showed co-localization (yellow) of both protein in FLT3-WT cells and hardly in FLT3-ITD cells. Representative pictures are shown. Immunofluorescences were visualized by confocal microscopy. Scale bars representing quantification of mean values $\pm$ SD of SET and FLT3 co-localization referred to total cell volume, demonstrating significantly less co-localization of SET/FLT3 in FLT3-ITD cells compare to FLT3-WT cells. The results are expressed as mean values $\pm$  SEM. Experiments were performed in triplicate four times. \* $p<0.05$  FLT3-ITD cells vs. FLT3-WT cells.

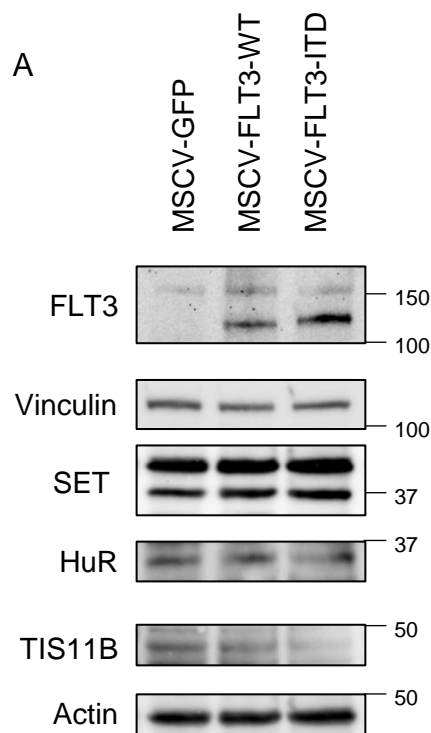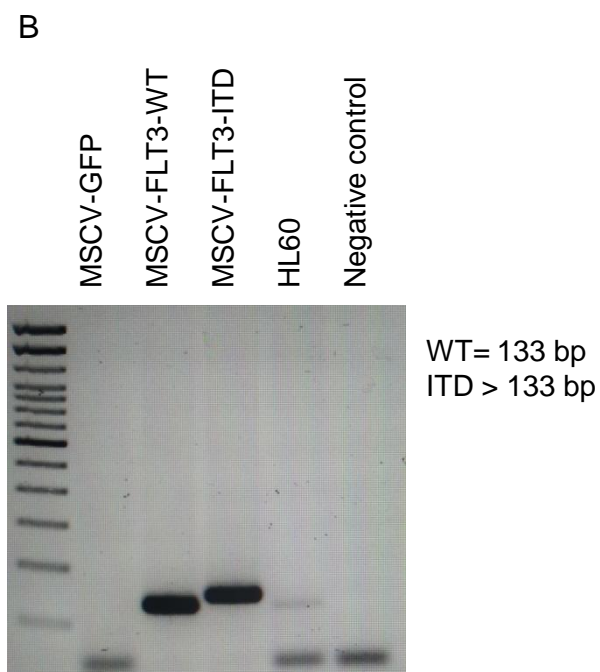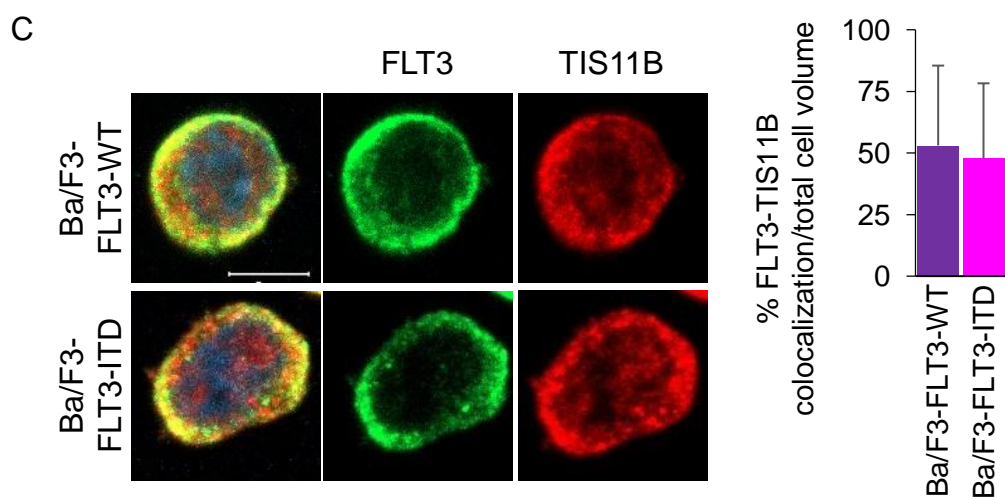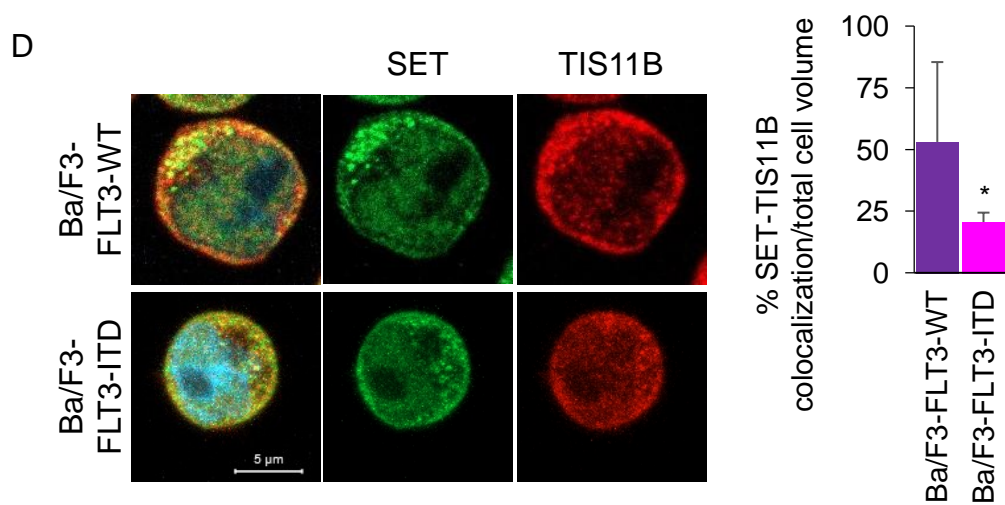

**Figure S3. SET and FLT3 interact in FLT3-WT AML cells but not in FLT3-ITD AML cells.** (A) Western blot analysis of Ba/F3 over expressing FLT3-WT or FLT3-ITD for FLT3, SET, HuR, TIS11B, RAC1 and normalized with Actin; indicating expression of those proteins in all cell lines. Representative WB are shown. (B) Agarose gel from PCR analysis of DNA from Ba/F3 over expressing the empty vector, FLT3-WT or FLT3-ITD; using the primers Primers: 11F:5'caatttaggtatgaaagcc 3' and 11R: 5'caaactctaaattttctct 3'. The FLT3-WT product is 133 bp and the FLT3-ITD product is bigger than 133 bp. (C) Immunofluorescence of FLT3 (green) and TIS11B (red) in Ba/F3 over expressing FLT3-WT or FLT3-ITD showed co-localization of both proteins (yellow). (D) Immunofluorescence of SET (green) and TIS11B (red) in Ba/F3 over expressing FLT3-WT or FLT3-ITD showed co-localization of both proteins in FLT3-WT and barely in FLT3-ITD over expressing cells. Nucleus are stained with DAPI (blue). Scale bar represent 5  $\mu$ m. Graphs represent mean values  $\pm$  SD of SET and FLT3 co-localization referred to total cell volume.

**NM\_004119.3 FLT3 [organism=Homo sapiens] [GenelD=2322] [transcript=1]**  
GCGCCGCTCCAGGCGGCATCGCAGGGCTGGGCCGGCGCGGCCTGGGGACCCCGGGCTCCGGAGGCCATGCCGGCGTTGGCGCGGAC  
GGCGGCCAGCTGCCGCTGCTCGTTGTTTTCTGCAATGATATTTGGGACTATTACAAATCAAGATCTGCCTGTGATCAAGTGTGTT  
TTAATCAATCATAAGAACAATGATTCATCAGTGGGGAAGTCATCATATCCCATGGTATCAGAATCCCCGGAAGACCTCGGGTGT  
GCGTTGAGACCCCAGAGCTCAGGGACAGTGTACGAAGCTGCCGCTGTGGAAGTGGATGTATCTGCTTCCATCACACTGCAAGTGTG  
GTCGACGCCCCAGGGAACATTTCTGTCTCTGGGTCTTTAAGCACAGCTCCCTGAATTGCCAGCCACATTTTGATTTACAAAACAGA  
GGAGTTGTTTCCATGGTCATTTTGAAAATGACAGAAACCCAAGCTGGAGAATACCTACTTTTTATTAGAGTGAAGCTACCAATTAC  
ACAATATTGTTTACAGTGAGTATAAGAAATACCCTGCTTTACACATTAAGAAGACCTTACTTTAGAAAAATGGAAAACAGGACGCC  
CTGGTCTGCATATCTGAGAGCGTTCCAGAGCCGATCGTGAATGGGTGCTTTGCGATTACAGGGGGAAAGCTGTAAAGAAGAAAGT  
CCAGCTGTTGTTAAAAAGGAGGAAAAAGTGCTTCATGAATTATTTGGGACGGACATAAGGTGCTGTGCCAGAAATGAACTGGGCAGG  
GAATGCACCAGGCTGTTTACAATAGATCTAAATCAAACCTCTCAGACCACATTGCCACAATTATTTCTTAAAGTAGGGGAACCTT  
TGGATAAGGTGCAAAGCTGTTTATGTGAACCATGGATTGGGCTCACCTGGGAATTAGAAAACAAAGCACTCGAGGAGGGCAACTAC  
TTTGAGATGAGTACCTATTCAACAAACAGAACTATGATACGGATTCTGTTTGCTTTTGATCATCAGTGGCAAGAAACGACACCGGA  
TACTACACTTGTTCTCTTCAAAGCATCCCAGTCAATCAGCTTTGGTTACCATCGTAGAAAAGGGATTTATAAATGCTACCAATTCA  
AGTGAAGATTATGAAATTGACCAATATGAAGAGTTTTGTTTTCTGTGAGGTTTAAAGCCTACCCACAAATCAGATGTACGTGGACC  
TTCTCTCGAAAATCATTTCTTGTGAGCAAAAGGGTCTTGATAACGGATACAGCATATCCAAGTTTTGCAATCATAAGCACCAGCCA  
GGAGAATATATATTCCATGCAGAAAATGATGATGCCCAATTTACCAAAATGTTACGCTGAATATAAGAAGGAAACCTCAAGTGCTC  
GCAGAAGCATCGGCAAGTCAGGCGTCTGTTTCTCGGATGGATACCCATTACCATCTTGACCTGGAAGAAGTGTTTCAGACAAGTCT  
CCCAACTGCACAGAAGAGATCACAGAAGGAGTCTGGAATAGAAAAGGCTAACAGAAAAGTGTTTGGACAGTGGGTGTCGAGCAGTACT  
CTAAACATGAGTGAAGCCATAAAAGGGTCTGTTCAAGTGCTGTGCATACAATTCCTTGGCACATCTTGTGAGACGATCCTTTTA  
AACTCTCCAGGCCCCCTTCCCTTTTATCCAAGACAACATCTCATTCTATGCAACAATTTGGTGTGTTGCTCCTCTTCATTGTGTTTTA  
ACCCTGCTAATTTGTACAAGTACAAAAAGCAATTTAGGTATGAAAGCCAGCTACAGATGGTACAGGTGACCGGCTCCTCAGATAAT  
GAGTACTTCTACGTTGATTTTCAAGAGAATATGAATATGATCTCAAATGGGAGTTTCCAAGAGAAAATTTAGAGTTTGGGAAGGTACTA  
GGATCAGGTGCTTTTGGAAAAGTGATGAACGCAACAGCTTATGGAATTAGCAAAAACAGGAGTCTCAATCCAGGTTGCCGTCAAAATG  
CTGAAAGAAAAAGCAGACAGCTCTGAAAGAGAGGCACTCATGTGAGAATCAAGATGATGACCCAGCTGGGAAGCCACGAGAATATT  
GTGAACCTGCTGGGGGCGTGCACACTGTCAGGACCAATTTACTTGATTTTTGAATACTGTTGCTATGGTGATCTTCTCAACTATCTA  
AGAAGTAAAAGAGAAAAATTTACAGGACTTGGACAGAGATTTTCAAGGAACACAATTTAGTTTTTACCCCACTTTCCAATCACAT  
CCAAATTCAGCATGCCTGGTTCAAGAGAAGTTCAGATACACCCGGACTCGGATCAAATCTCAGGGCTTCATGGGAATTCATTTAC  
TCTGAAGATGAAATTGAATATGAAAACCAAAAAAGGCTGGAAGAAGAGGAGGACTTGAATGTGCTTACATTTGAAGATCTTCTTTGC  
TTTGCATATCAAGTTGCCAAAGGAATGGAATTTCTGGAATTTAAGTCGTGTGTTTACAGAGACCTGGCCGCCAGGAACGTGCTTGTC  
ACCCACGGGAAAGTGGTGAAGATATGTGACTTTGGATTGGCTCGAGATATCATGAGTGATTCCAATCTATGTTGTCAGGGGCAATGCC  
CGTCTGCCTGTAAATGGATGGCCCCGAAAGCCTGTTTGAAGGCATCTACACCATTAAGAGTGATGTCTGGTCATATGGAATATTA  
CTGTGGGAAATCTTCTCACTTGGTGTGAATCCTTACCCTGGCATTCCGGTTGATGCTAATCTTACAACTGATTCAAAATGGATTT  
AAAATGGATCAGCCATTTTATGCTACAGAAGAAATATACATTATAATGCAATCCTGCTGGGCTTTTACTCAAGGAAACGGCCATCC  
TTCCCTAATTTGACTTCGTTTTTAGGATGTCAGCTGGCAGATGCAGAAGAAGCGATGTATCAGAATGTGGATGGCCGTGTTTCGGAA  
TGTCTCTCACACCTACCAAAACAGGCGACCTTTACGAGAGAGATGGATTTGGGGCTACTCTCTCCGACGGCTCAGGTGGAAGATTG  
TAGAGGAACAATTTAGTTTTAAGGACTTCATCCCTCCACCTATCCCTAACAGGCTGTAGATTACCAAAACAAGATTAATTTATCAC  
TAAAGAAAATCTATTATCAACTGCTGCTTACCAGACTTTTCTCTAGAAGCTGTCTGCGTTTACTCTTGTTTTCAAAGGGACTTTT  
GTAAAATCAAATCATCTGTGACAAGGCAGGAGGAGCTGATAATGAACTTTATTGGAGCATTGATCTGCATCCAAGGCCTTCTCAGG  
CTGGCTTGAGTGAATTGTGTACCTGAAGTACAGTATATTCTTGTAATATACATAAAACAAAAGCATTGCTAAGGAGAAGCTAATAT  
GATTTTTTAAGTCTATGTTTTAAATAATATGTAATTTTTTCACTATTTAGTGATATATTTTATGGGTGGGAATAAAATTTTCTACT  
ACAGAATTGCCATTATTGAATTATTTATCATGGTATAATTAGGGCAAGTCTTAAGTGGAGTTCACGAACCCCTGAAATTGTGCACC  
CATAGCCACCTACACATTCCTTCCAGAGCACGTGTGCTTTTACCCCAAGATACAAGGAATGTGTAGGCAGCTATGGTTGTACAGCC  
TAAGATTTCTGCAACAACAGGGGTTGTATTGGGGGAAGTTTATAATGAATAGGTGTTCTACCATAAAGAGTAATACATCACCTAGAC  
ACTTTGGCGGCCTTCCAGACTCAGGGCCAGTCAGAAGTAACATGGAGGATTAGTATTTTCAATAAAGTTACTCTTGCCCCACA

**Figure S4. mRNA sequence of FLT3.** Start and stop codons are colored in blue, 5'UTR is colored in orange and 3'UTR in green. Highlighted in yellow is the canonical sequence for TIS11B binding.

# FLT3 amino acid sequence

| 10         | 20            | 30         | 40          | 50         |
|------------|---------------|------------|-------------|------------|
| MPALARDGGQ | LPLLVVFSAM    | IFGTITNQDL | PVIKCVLINH  | KNNDSSVGKS |
| 60         | 70            | 80         | 90          | 100        |
| SSYPMVSESP | EDLGCALRPQ    | SSGTVYEAAA | VEVDVSASIT  | LQVLVDAPGN |
| 110        | 120           | 130        | 140         | 150        |
| ISCLWVFKHS | SLNCQPHFDL    | QNRGVVSMVI | LKMTETQAGE  | YLLFIQSEAT |
| 160        | 170           | 180        | 190         | 200        |
| NYTILFTVSI | RNTLLYTLRR    | PYFRKMENQD | ALVCISESVP  | EPIVEWVLCD |
| 210        | 220           | 230        | 240         | 250        |
| SQGESCKEES | PAVVKKEEKV    | LHELFGTDIR | CCARNELGRE  | CTRLFTIDLN |
| 260        | 270           | 280        | 290         | 300        |
| QTPQTTLPQL | FLKVGEPLWI    | RCKAVHVNHG | FGLTWELENK  | ALEEGNYFEM |
| 310        | 320           | 330        | 340         | 350        |
| STYSTNRTMI | RILFAFVSSV    | ARNDTGYITC | SSSKHPSQSA  | LVTIVEKGF  |
| 360        | 370           | 380        | 390         | 400        |
| NATNSSDYE  | IDQYEEFCFS    | VRFKAYPQIR | CTWTFSRKSF  | PCEQKGLDNG |
| 410        | 420           | 430        | 440         | 450        |
| YSISKFCNHK | HQPGEYIFHA    | ENDDAQFTKM | FTLNIRRKPQ  | VLAEASASQA |
| 460        | 470           | 480        | 490         | 500        |
| SCFSDGYPLP | SWTWKKCSDK    | SPNCTEEITE | GVWNRKANRK  | VFGQWVSSST |
| 510        | 520           | 530        | 540         | 550        |
| LNMSIAIKGF | LVKCCAYNSL    | GTSCETILLN | SPGPFPIQD   | NISFYATIGV |
| 560        | 570           | 580        | 590         | 600        |
| CLLFIVVLTL | LICHKKYKQF    | RYESQLQMVQ | VTGSSDNEYF  | YVDFREYEYD |
| 610        | 620           | 630        | 640         | 650        |
| LKWEFPR    | ENLEFGKVLGSGA | FGKVMNATAY | GISKTGVSIQ  | VAVKMLKEKA |
| 660        | 670           | 680        | 690         | 700        |
| DSSEREALMS | ELKMMTQLGS    | HENIVNLLGA | CTLSGPIYLI  | FEYCCYGDLL |
| 710        | 720           | 730        | 740         | 750        |
| NYLRSKREKF | HRTWTEIFKE    | HNFSFYPTFQ | SHPNSSMPGS  | REVQIHPDSD |
| 760        | 770           | 780        | 790         | 800        |
| QISGLHGNSF | HSEDEIEYEN    | QKRLEEEEDL | NVLTFFEDLLC | FAYQVAKGME |
| 810        | 820           | 830        | 840         | 850        |
| FLEFKSCVHR | DLAARNVLVT    | HGKVVKICDF | GLARKDIMSDS | NYVVRGNARL |
| 860        | 870           | 880        | 890         | 900        |
| PVKWMAPESL | FEGIYTIKSD    | VWSYGILLWE | IFSLGVNPYP  | GIPVDANFYK |
| 910        | 920           | 930        | 940         | 950        |
| LIQNGFKMDQ | PFYATEEIIYI   | IMQSCWAFDS | RKRPSFPNLT  | SFLGCQLADA |
| 960        | 970           | 980        | 990         |            |
| EEAMYQNVDG | RVSECPHTYQ    | NRRPFSREMD | LGLLSPQAQV  | EDS        |

**Figure S5. FLT3 amino acid sequence.** The extracellular domain is highlighted in pink. Transmembrane domain is highlighted in green. Positively charge amino acid from the cytosolic domain, indicating potential SET-binding sites are highlighted in yellow and colored. The amino acid implicated in the ITD mutation are highlighted in red

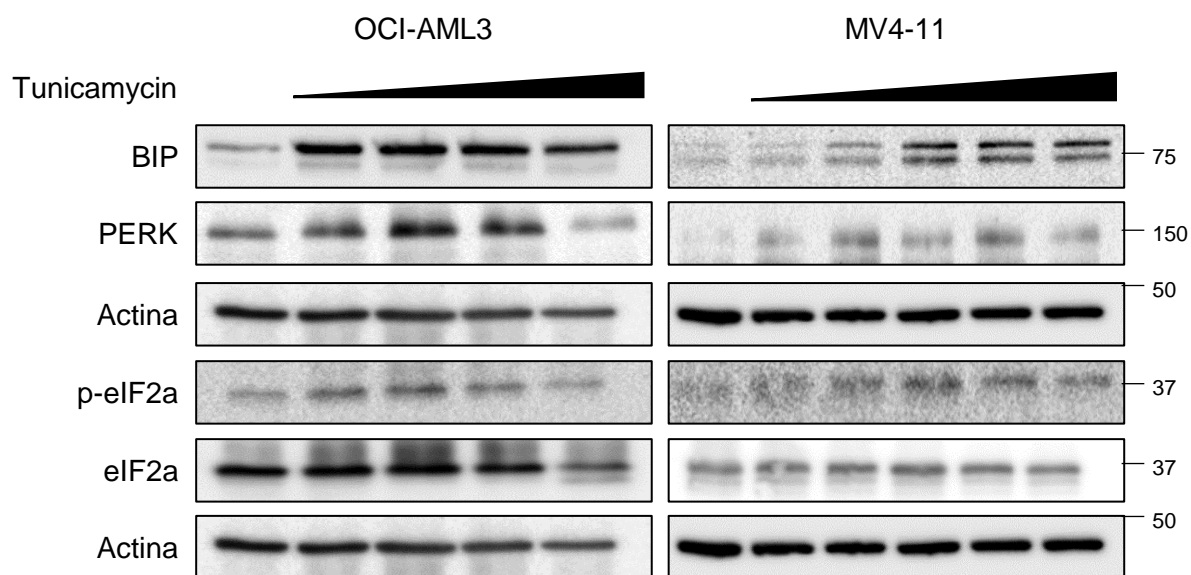

**Figure S6. Tunicamycin induces UPR response.** AML cells were treated with increasing concentrations of tunicamycin (0, 25, 50, 100, 200, 400 ng/ml) for 24 h and western blot analysis of the UPR markers were performed. Representative WB are shown.



A

OCI-AML3

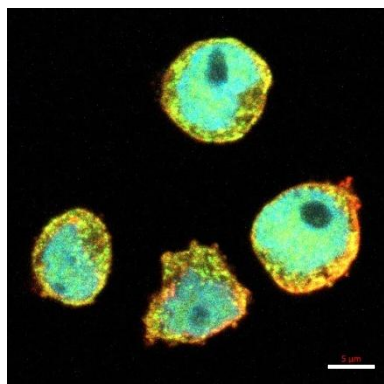

FLT3

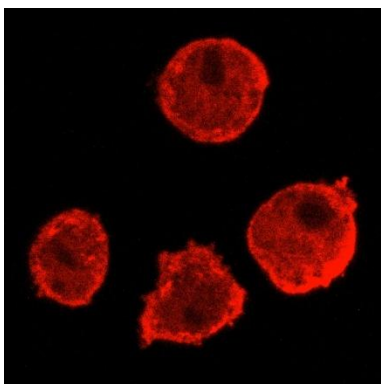

SET

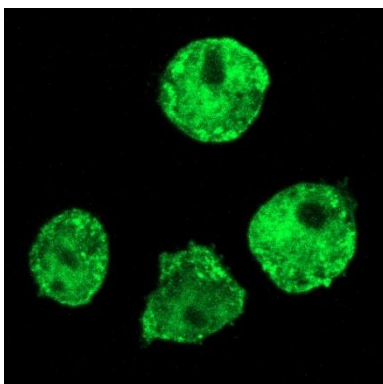

MV4-11

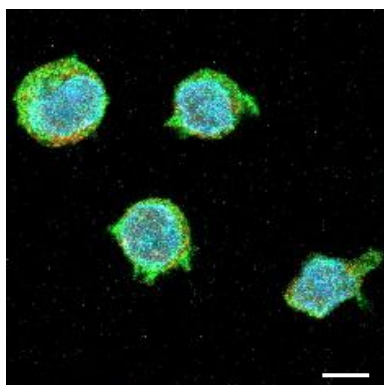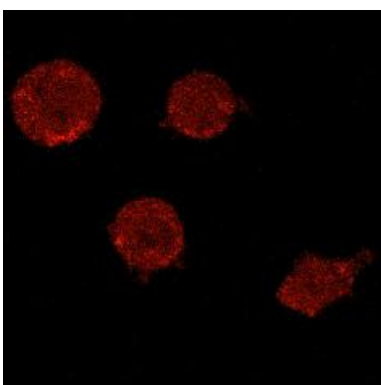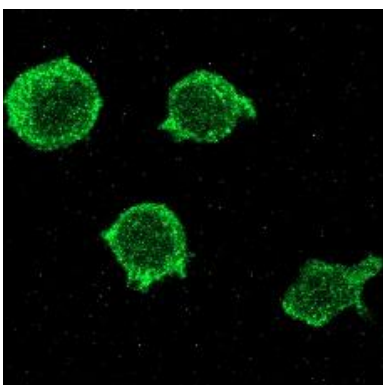

Ba/F3-  
FLT3-WT

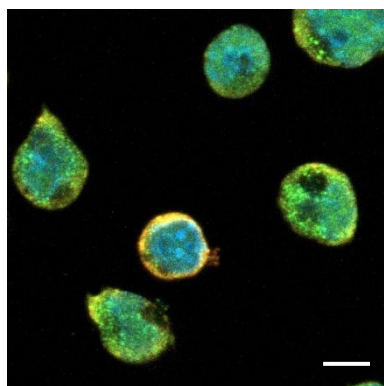

FLT3

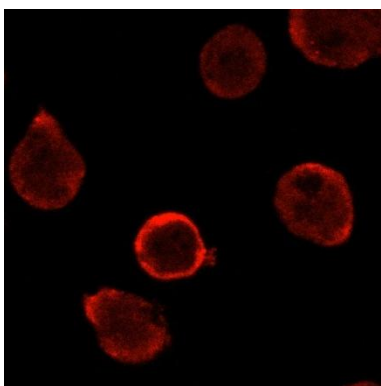

SET

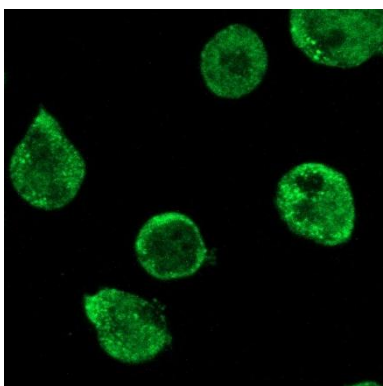

Ba/F3-  
FLT3-ITD

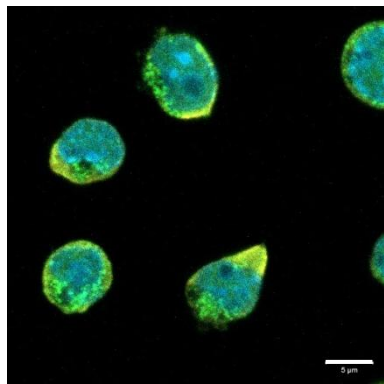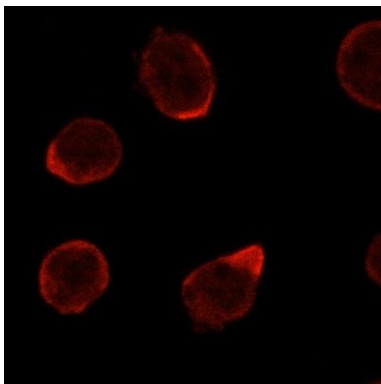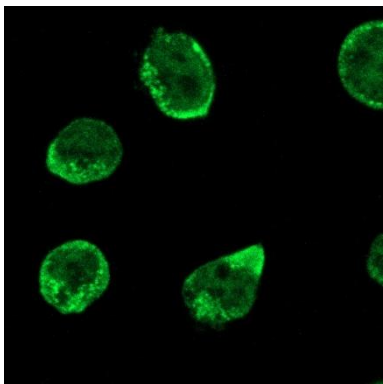



B

TIS11B

FLT3

OCI-AML3

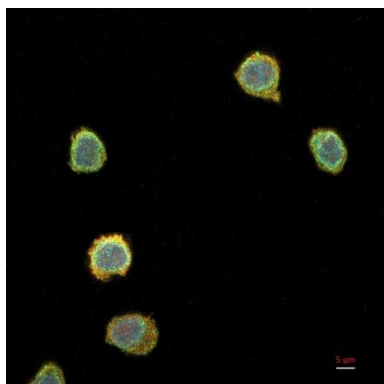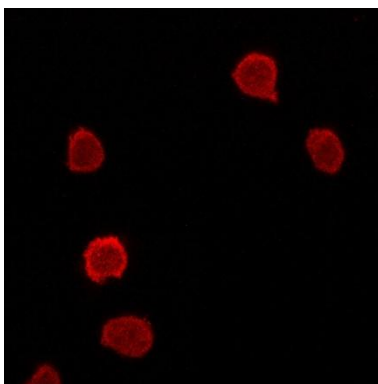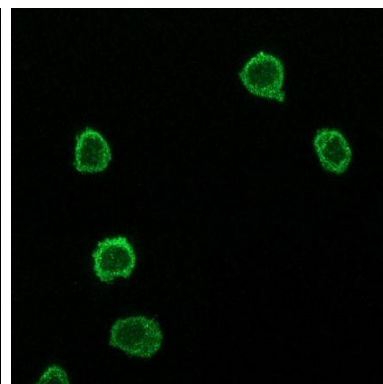

MV4-11

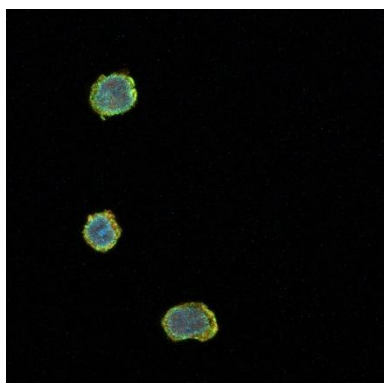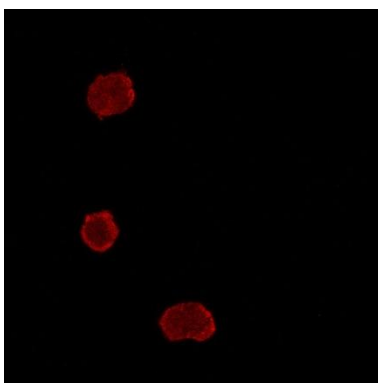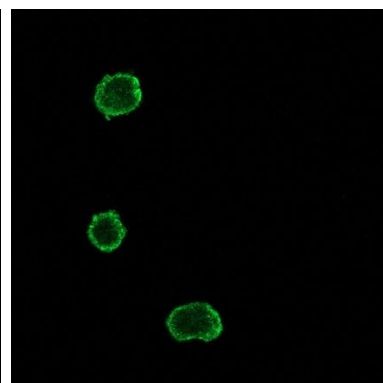

TIS11B

SET

OCI-AML3

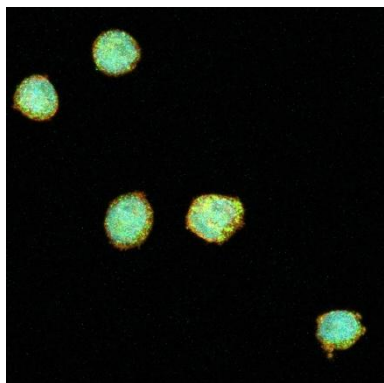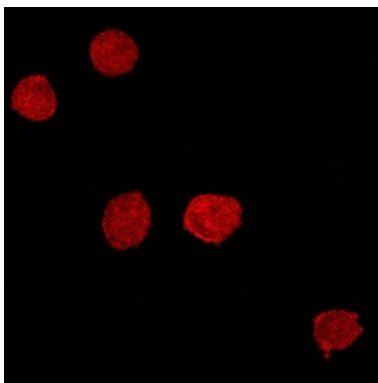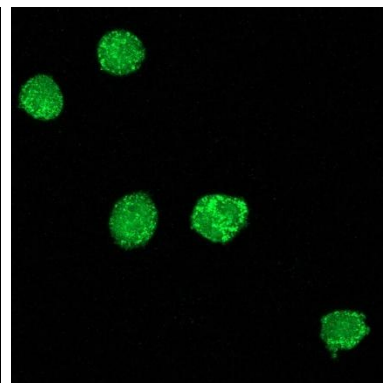

MV4-11

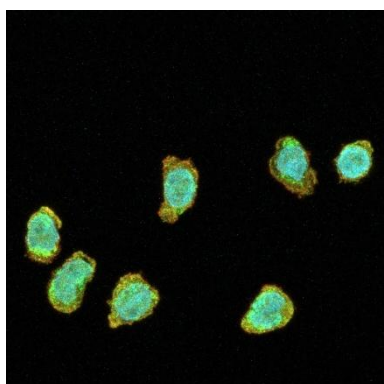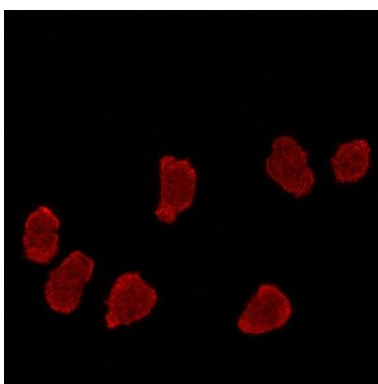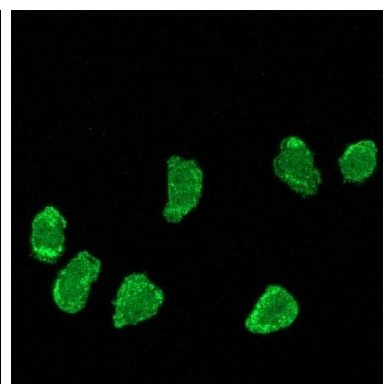

OCI-AML3

DMSO

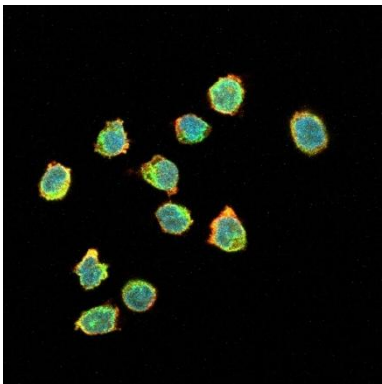

FLT3

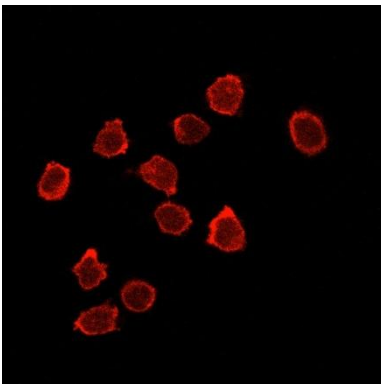

SET

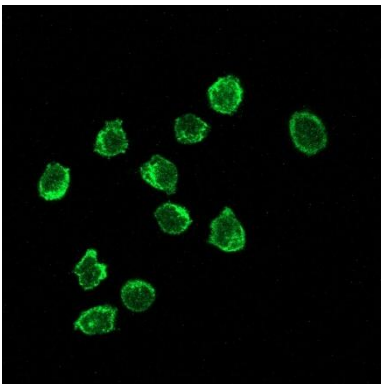

Tunicamycin

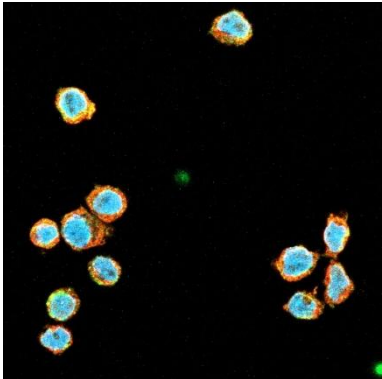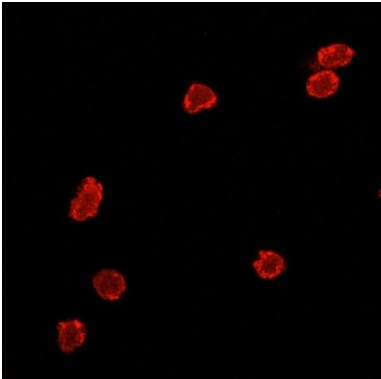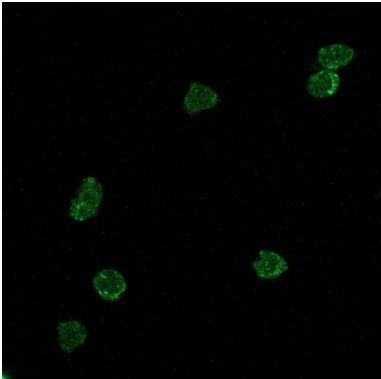

MV4-11

DMSO

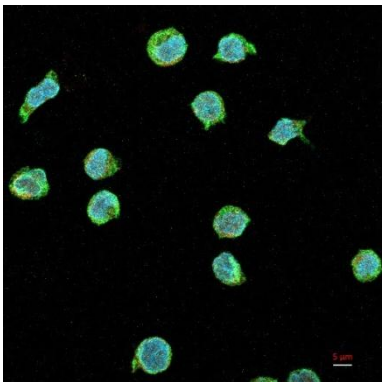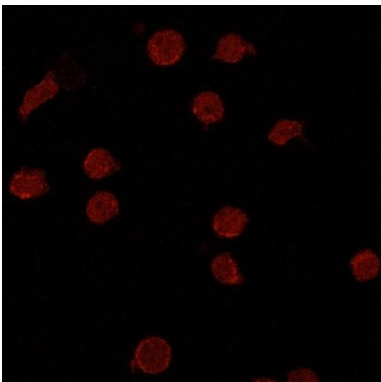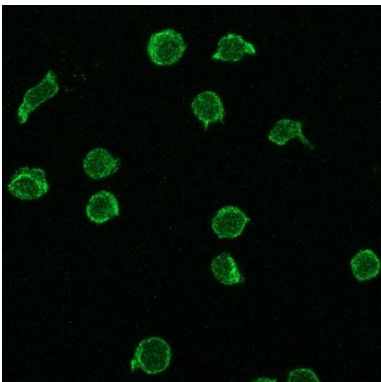

Tunicamycin

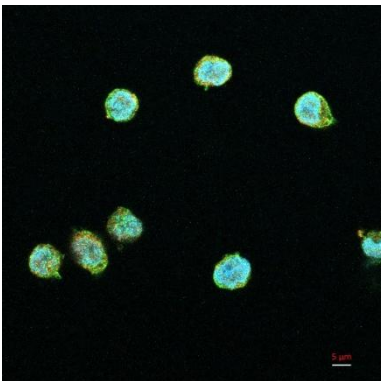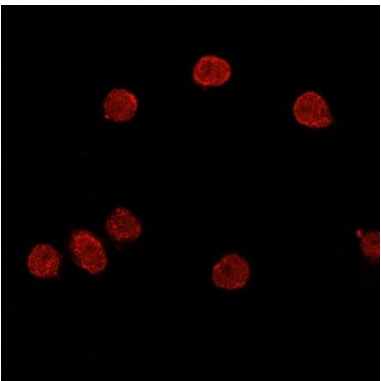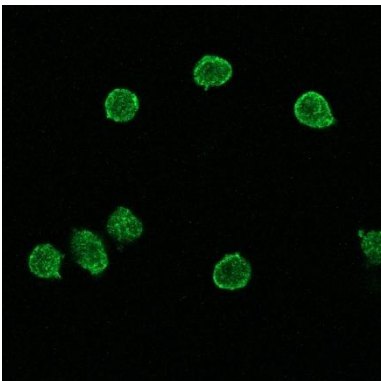

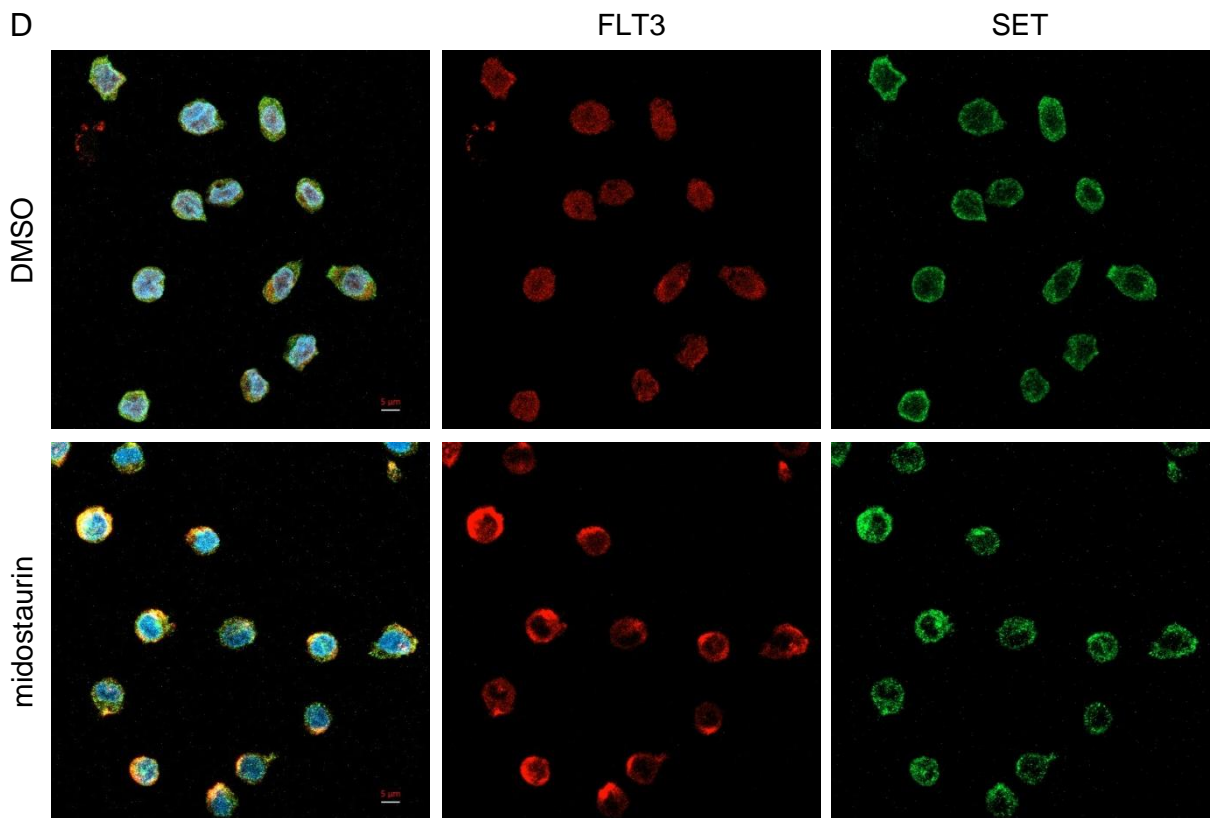

**Figure S7. Panoramic view of immunofluorescence.** (A) Immunofluorescence of SET (green) and FLT3 (red) in FLT3-WT cell lines (OCI-AML3 and Ba/F3-FLT3-WT) and FLT3-ITD cell lines (MV4-11 and Ba/F3-FLT3-ITD). Confocal microscopy showed co-localization (yellow) of both protein. (B) Immunofluorescence of FLT3 (green) and TIS (red) and SET (green) and TIS (red) in FLT3-WT cell line OCI-AML3 and FLT3-ITD cell line MV4-11. Confocal microscopy showed co-localization (yellow) of both protein. (C) Immunofluorescence of SET (green) and FLT3 (red) in FLT3-WT cell line OCI-AML3 and FLT3-ITD cell line MV4-11 treated with and without tunicamycin (200  $\mu\text{g/ml}$ ) for 24 h. Confocal microscopy showed co-localization (yellow) of both protein. (D) Immunofluorescence of SET (green) and FLT3 (red) in FLT3-WT cell line OCI-AML3 and FLT3-ITD cell line MV4-11 treated with and without midostaurin (20  $\text{ng/ml}$ ) for 24 h. Confocal microscopy showed co-localization (yellow) of both protein. Nuclei were stained with DAPI (blue). Representative pictures are shown. Immunofluorescences were visualized by confocal microscopy. Experiments were performed in triplicate four times.

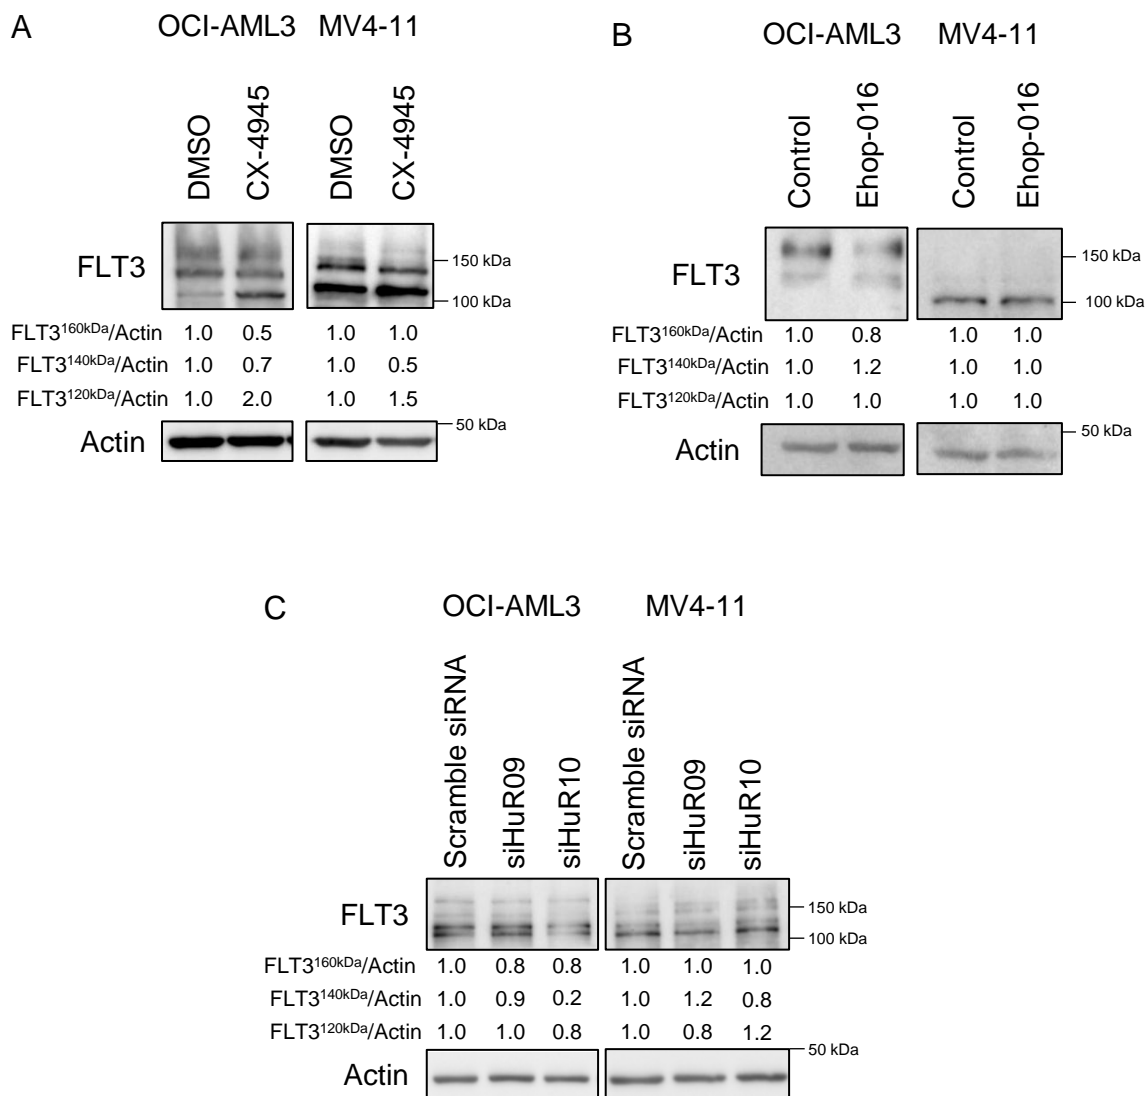

**Figure S8. Relative bands of FLT3.** Western blot analysis of FLT3 after CX-4945 (**A**) and Ehop-016 treatment (**B**) and HuR silencing (**C**) in OCI-AML and MV4-11 cells. Quantification of the relative FLT3 bands demonstrated a decreased in the 150kDa mature band along with an increase in <150 kDa immature bands in FLT3-WT cells but not in FLT3-ITD cells. A representative WB is shown.

**Table S1. List of drugs used**

| Reagent     | Ref#  | Source                | Concentration |
|-------------|-------|-----------------------|---------------|
| CX-4945     | S2248 | Selleckchem Chemicals | 5µM           |
| Ehop-016    | S7319 | Selleckchem Chemicals |               |
| FTY720      | S5002 | Selleckchem Chemicals | 5µM           |
| Midostaurin | M1323 | SIGMA                 | 20 nM         |
| DT-061      | S8774 | Selleckchem Chemicals | 2.5 and 4 µM  |

**Table S2. List of antibodies used**

| Target                                                   | Ref#       | Source                   | Application |
|----------------------------------------------------------|------------|--------------------------|-------------|
| Alexa fluor 488 donkey anti-goat                         | A-11055    | Invitrogen               | IF          |
| Alexa fluor 488 donkey anti-mouse                        | A21202     | Invitrogen               | IF          |
| Alexa fluor 555 donkey anti-rabbit                       | A31572     | Invitrogen               | IF          |
| Alexa fluor 568 donkey anti-mouse                        | A10037     | Invitrogen               | IF          |
| Amersham ECL Mouse IgG, HRP-linked whole Ab (from sheep) | NA931      | Amersham                 | WB          |
| Anti-rabbit IgG, HRP-linked Antibody                     | 7074       | Cell signaling           | WB          |
| Donkey anti-goat IgG HRP affinity purified PAB           | 04HAF109   | R&D systems              | WB          |
| PE Mouse anti-Human CD135                                | 558996     | BD Pharmingen            | FACS        |
| ELAV1/ HuR                                               | 12582      | cell signalling          | WB          |
| ELAV1/ HuR                                               | 7468       | MERCK                    | RIP         |
| FLT3                                                     | 3462       | cell signalling          | WB, IP      |
| RAC1                                                     | 66122-1-Ig | Proteintech              | WB          |
| SET                                                      | A302-261A  | Bethyl                   | IP, WB      |
| SET                                                      | sc-5655    | Santa Cruz Biotechnology | IF          |
| ZFP36L1/2 (TIS11B)                                       | 12306-1-AP | Proteintech              | IF, WB      |
| β-Actin                                                  | A5441      | Sigma                    | WB          |
