# Supplementary figures and images for: Set Protein Is Involved in FLT3 Membrane Trafficking
Source: MDPI journal article supplement (doi:10.3390/cancers15082233), 2023-04-10

Figure 1E

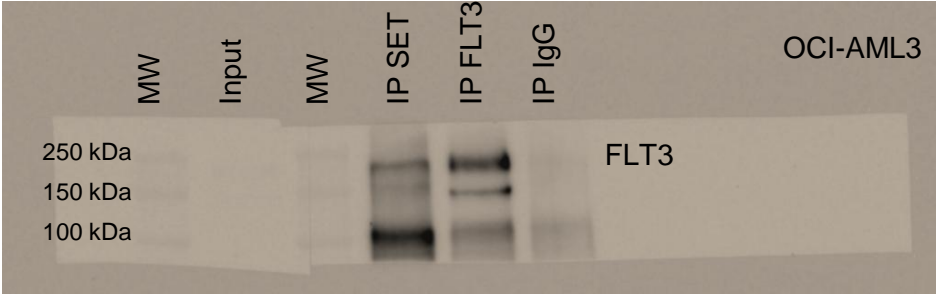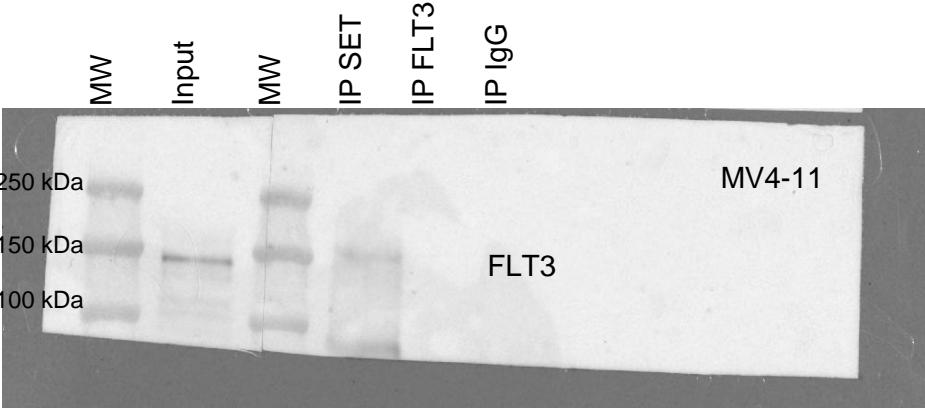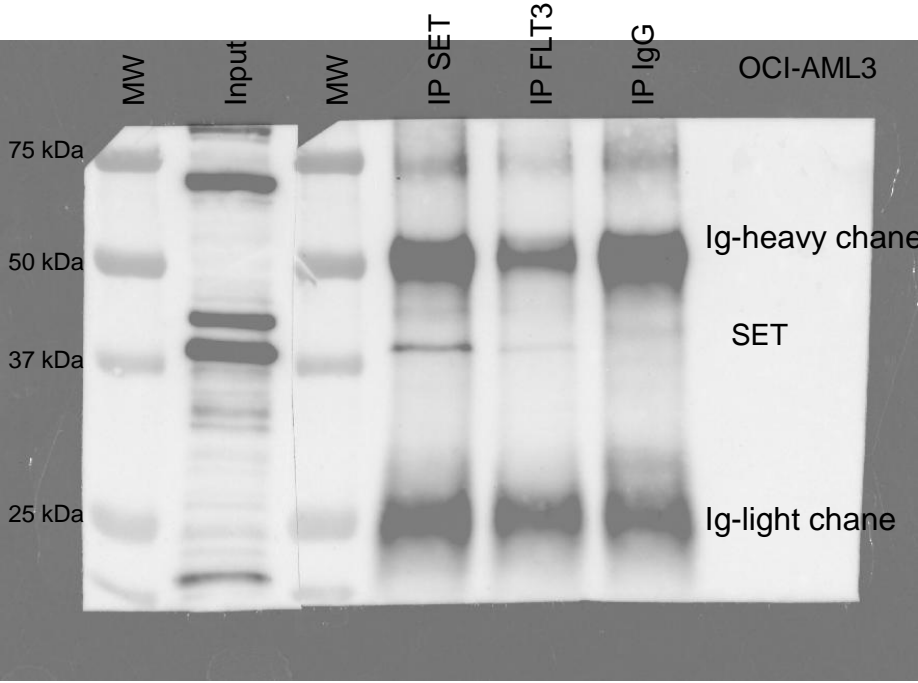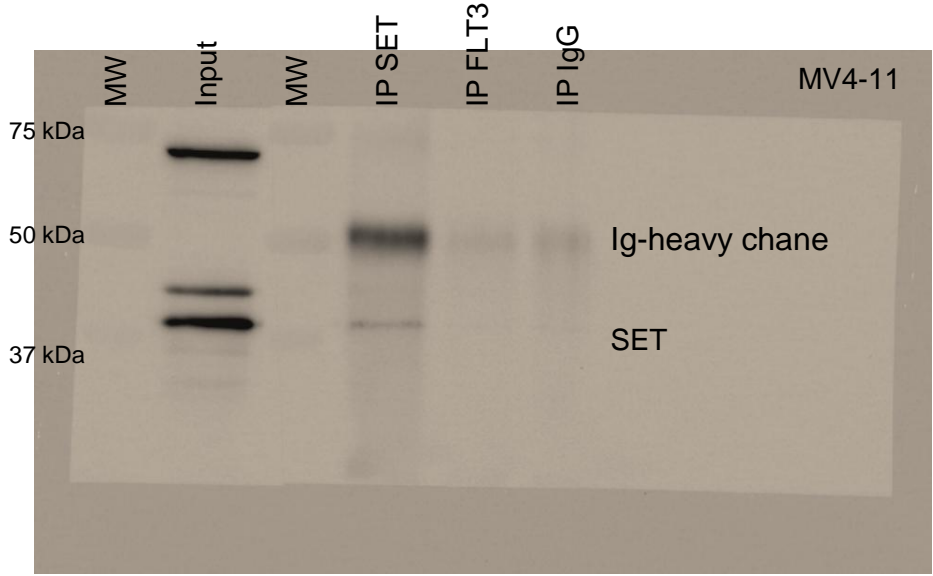

**Figure 2A**

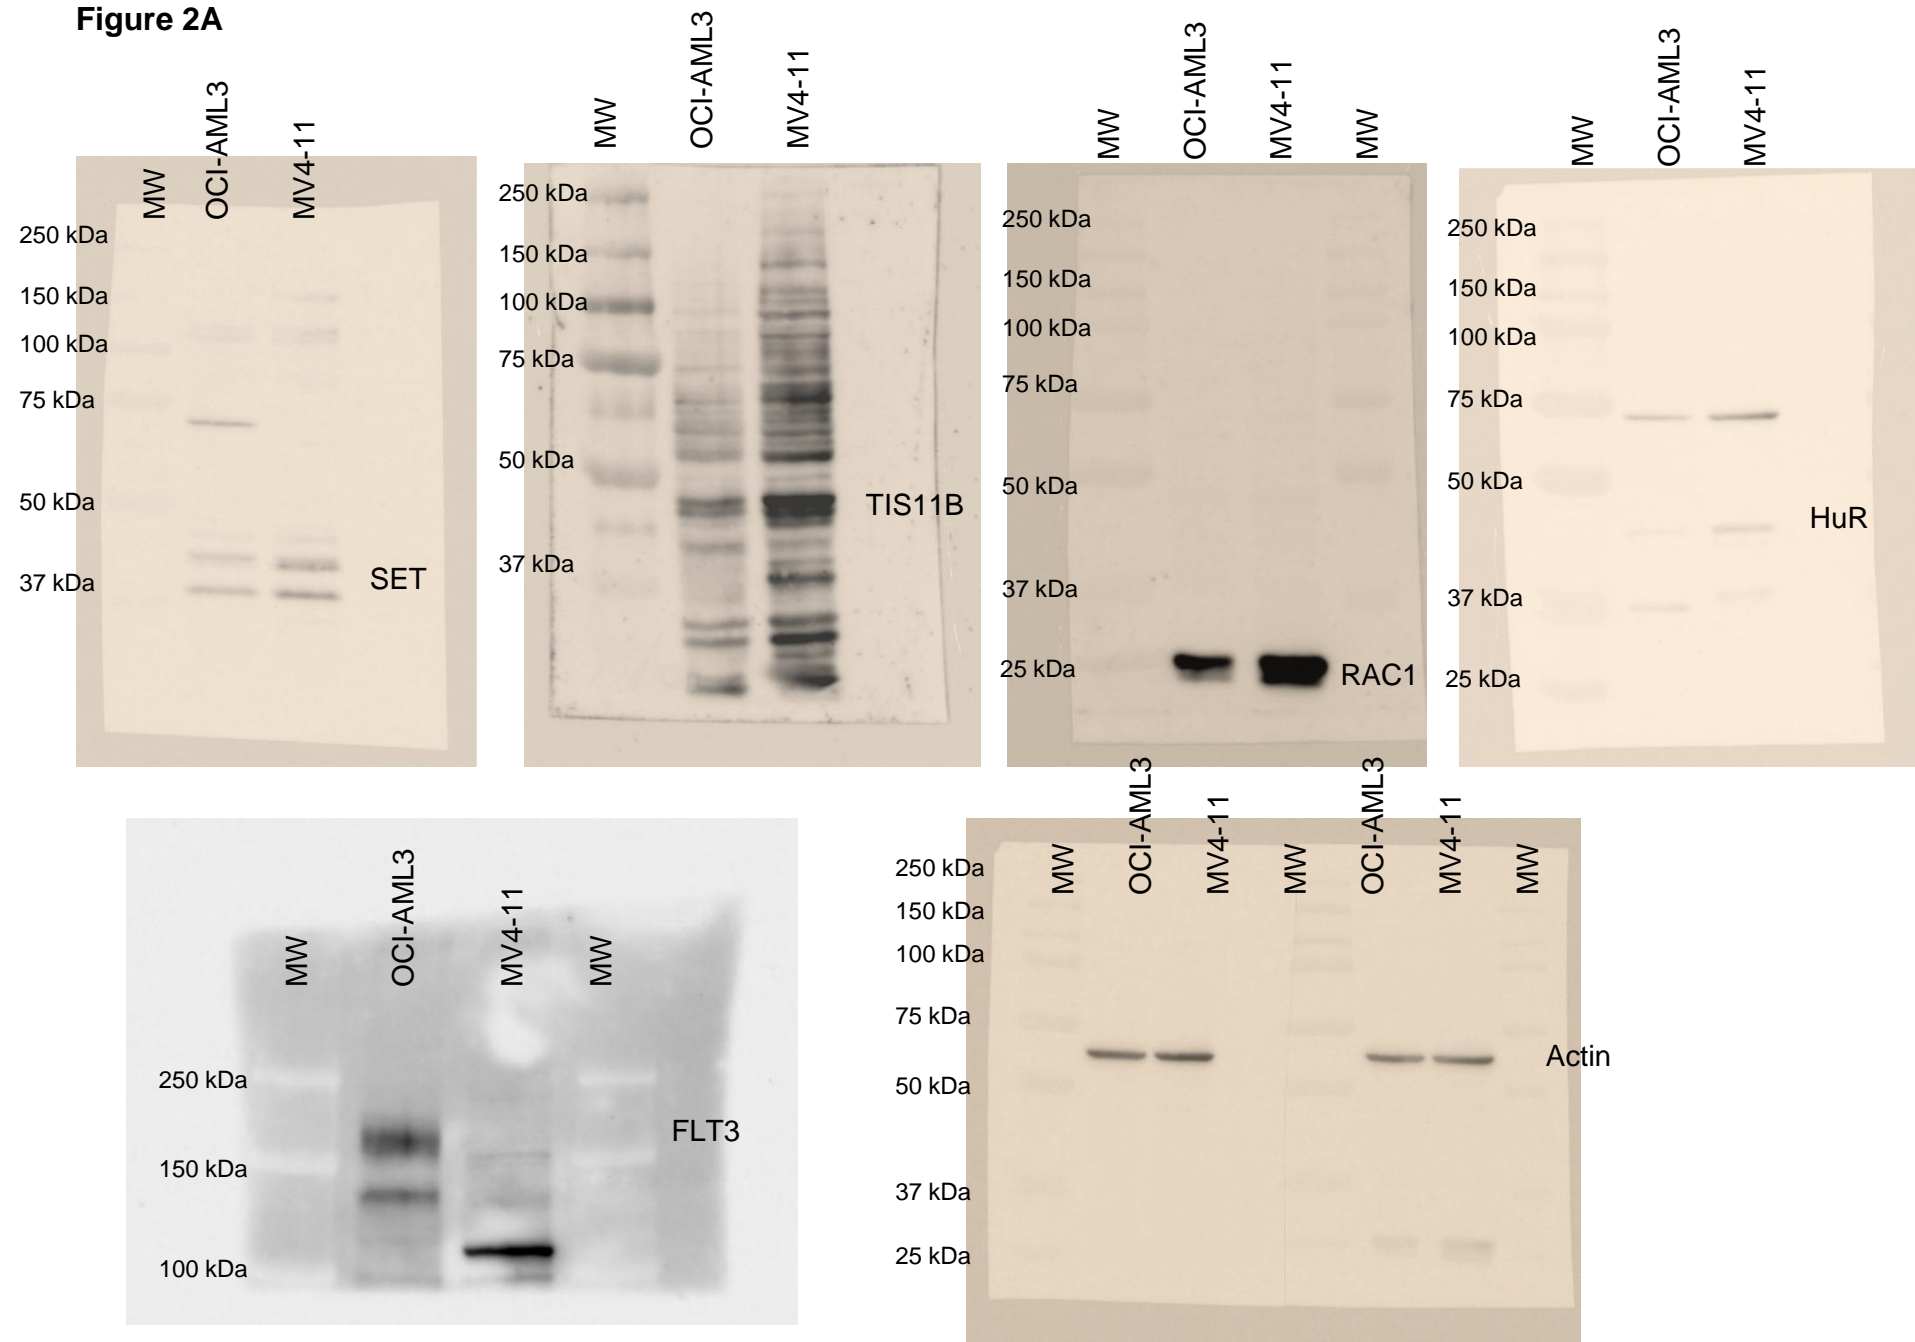

Figure 2E

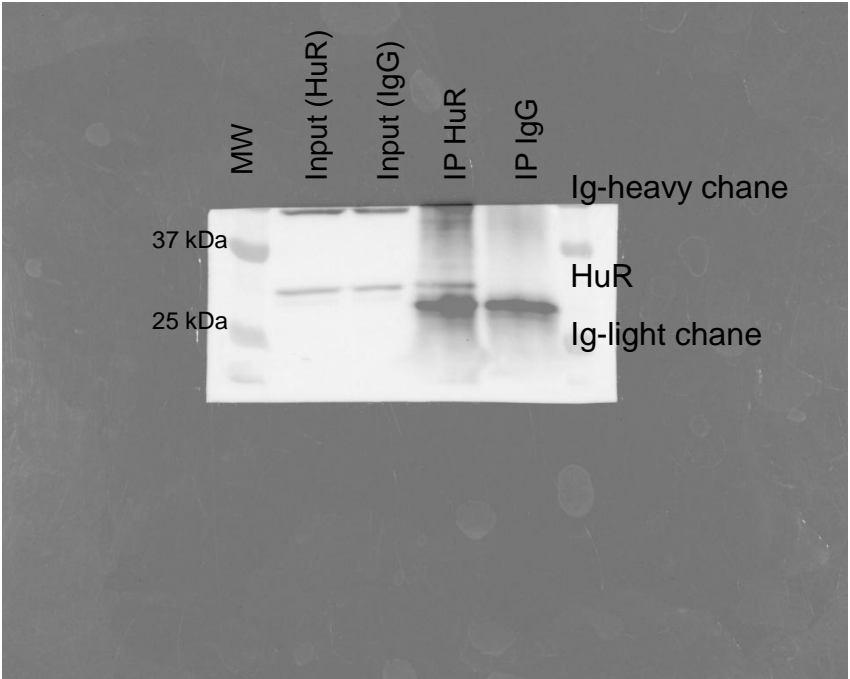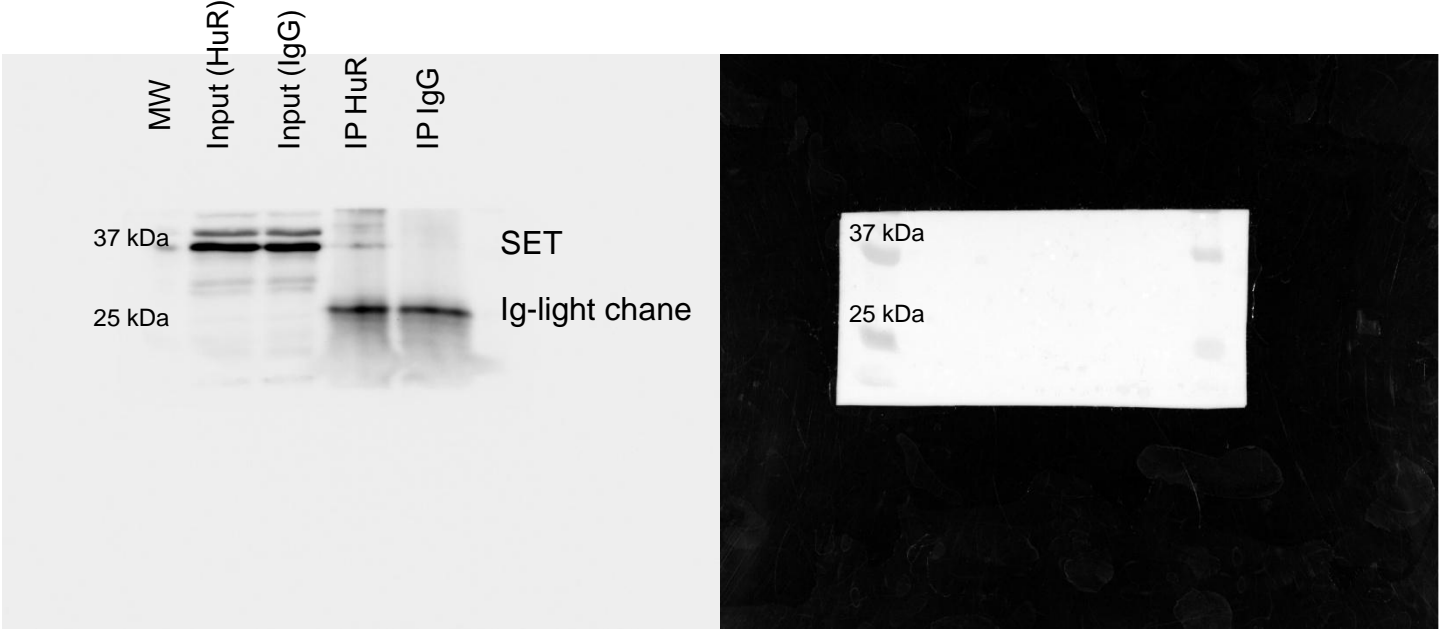

Figure 3C

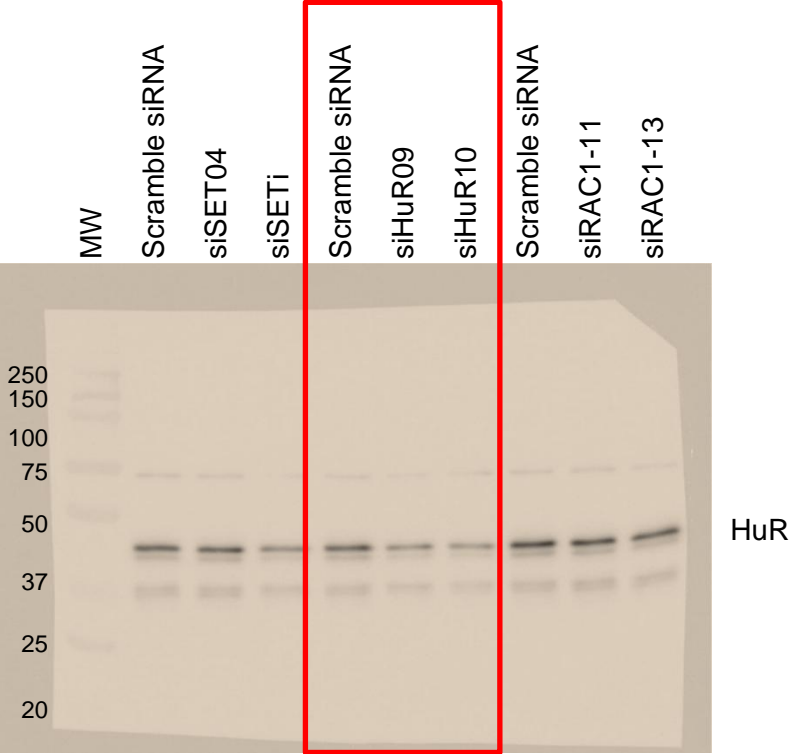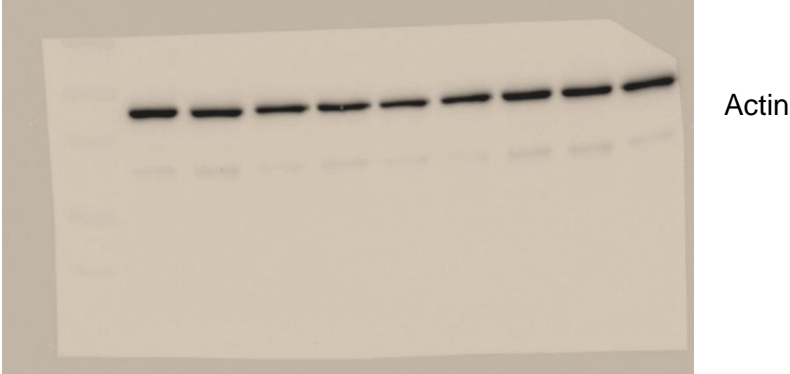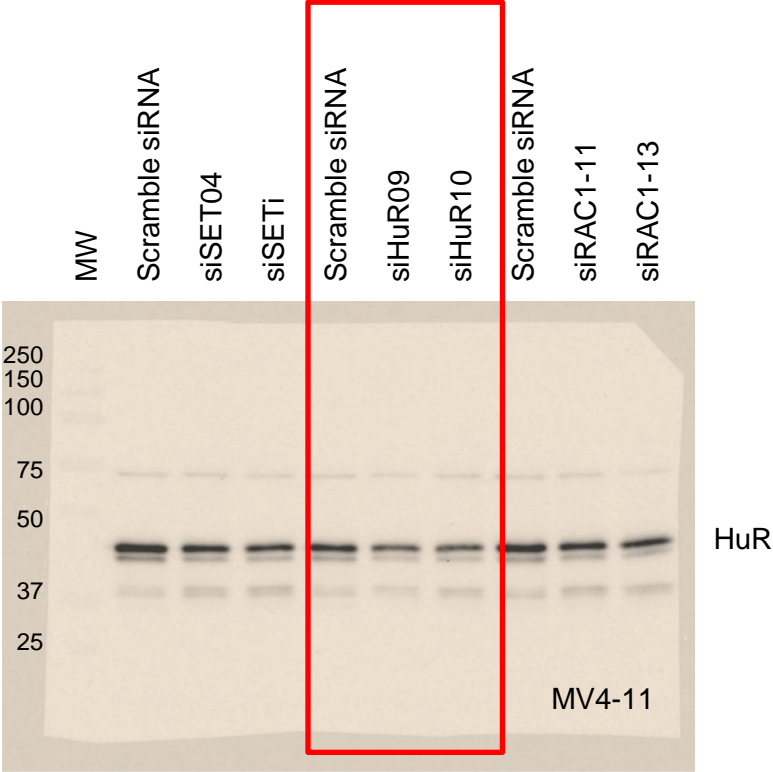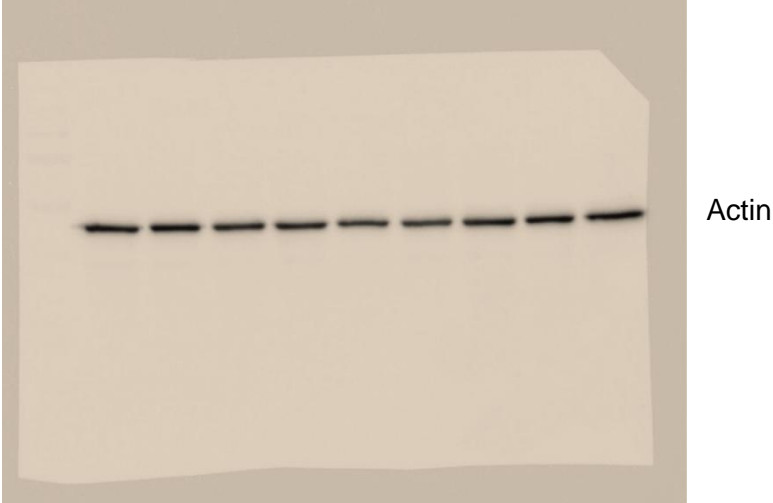

Supplement: s1 [file s1]
